# Supplementary material for: Automated parallel isolation of multiple species of non-coding RNAs by the reciprocal circulating chromatography method
Source: PubMed Central journal article supplement — Nucleic Acids Res. 2007 Jan 23;35(4):e24. doi: 10.1093/nar/gkl1129 (PMC1851638; doi:10.1093/nar/gkl1129), 2007-01-23
Supplement: nar_gkl1129_1.pdf [file nar_gkl1129_1.pdf]

# Supplementary Figure 1

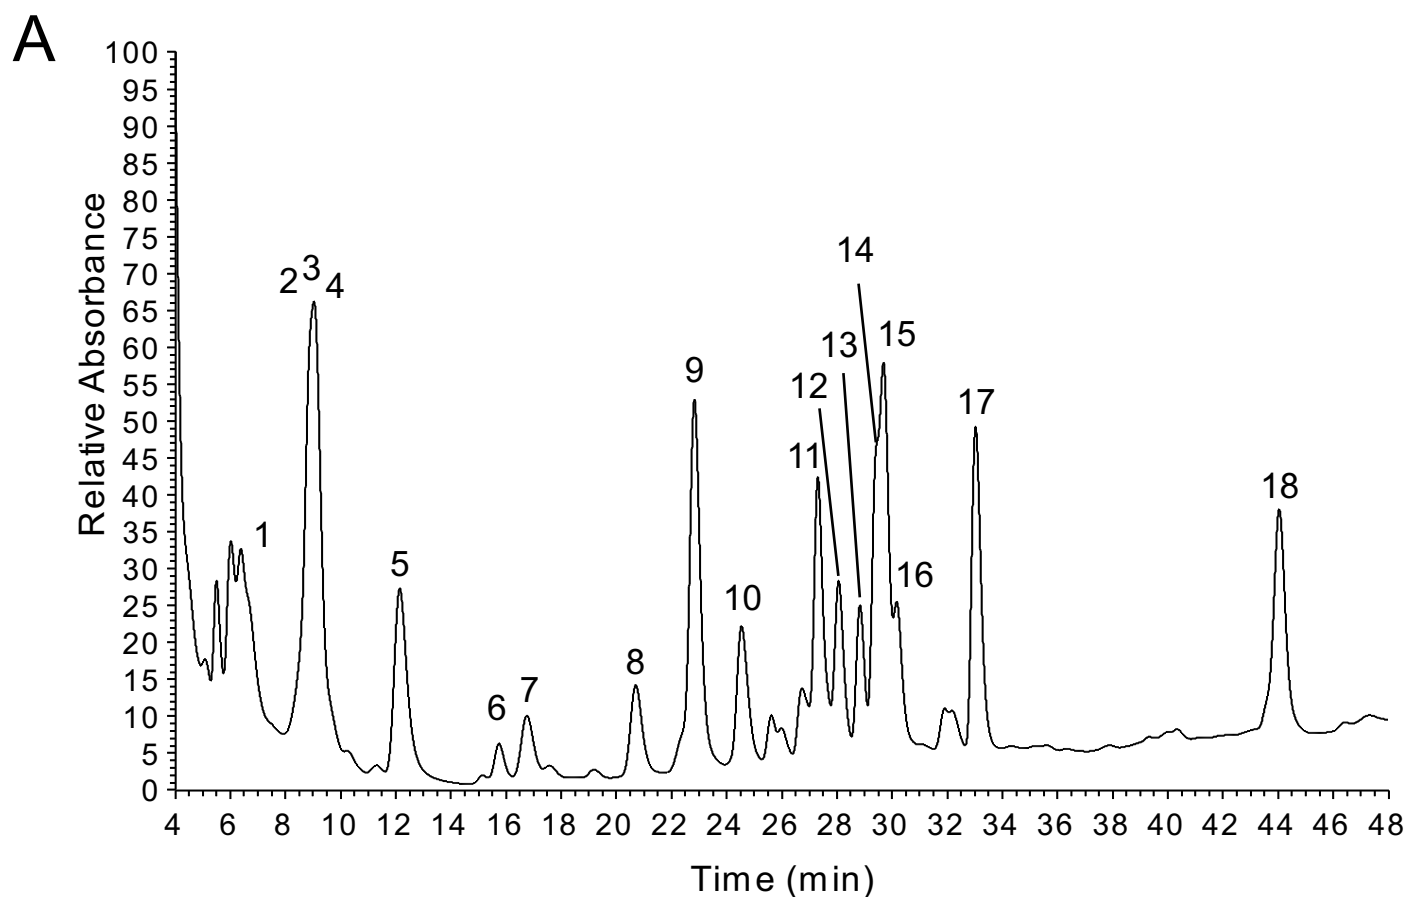

**B**

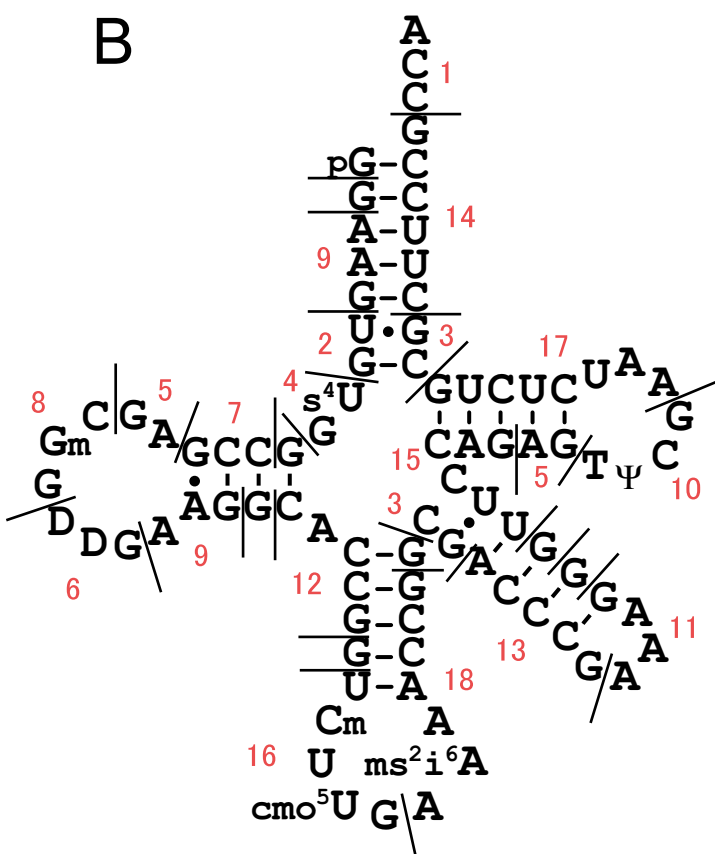

**C**

| Fragment No. | Sequence                               | Average mass | Monoisotopic mass | Observed m/z |
|--------------|----------------------------------------|--------------|-------------------|--------------|
| 1            | CCA                                    | 877.6        | 877.2             | 876.2        |
| 2            | UG                                     | 669.4        | 669.1             | 668.1        |
| 3            | CG                                     | 668.4        | 668.1             | 667.1        |
| 4            | s <sup>4</sup> UG                      | 685.5        | 685.1             | 684.1        |
| 5            | AG                                     | 692.4        | 692.1             | 691.1        |
| 6            | DDG                                    | 979.6        | 979.1             | 978.3        |
| 7            | CCG                                    | 973.6        | 973.1             | 972.1        |
| 8            | CGmG                                   | 1027.6       | 1027.2            | 1025.8       |
| 9            | AAG                                    | 1021.6       | 1021.2            | 1020.1       |
| 10           | TΨCG                                   | 1294.8       | 1294.2            | 1292.9       |
| 11           | AAAG                                   | 1350.9       | 1350.2            | 1349.0       |
| 12           | CACCG                                  | 1608.0       | 1607.2            | 1606.2       |
| 13           | ACCCG                                  | 1608.0       | 1607.2            | 1606.0       |
| 14           | CUUCCG                                 | 1891.1       | 1890.2            | 1889.3       |
| 15           | UUCCAG                                 | 1915.1       | 1914.2            | 1913.0       |
| 16           | UCmUcmo <sup>5</sup> UG                | 1675.0       | 1674.2            | 1673.4       |
| 17           | AAUCUCUG                               | 2550.5       | 2549.3            | 1274.1       |
| 18           | Ams <sup>2</sup> i <sup>6</sup> AAACCG | 2404.6       | 2403.4            | 1200.8       |
